# Supplementary material
Source: Springer Nature journal article supplement (https://www.springermedizin.de/resource/supplementary/12939_2005_45_MOESM1_ESM.pdf/9551386)
Supplement: MOESM1 [file 9551386]

# **General Population**

```
graph TD; A[General Population] --> B[40 888 adults were invited from the 5 age cohorts from Oslo]; B --> C[30 530 Invited Norwegians]; B --> D[884 Invited Pakistanis]; C --> E[13 581 Participated]; D --> F[339 Participated];
```

**40 888 adults were invited from the 5 age cohorts from Oslo**

**30 530 Invited Norwegians**

**884 Invited Pakistanis**

**13 581 Participated**

**339 Participated**
